# Supplementary material
Source: Springer Nature journal article supplement (https://www.springermedizin.de/resource/supplementary/12885_2012_3212_MOESM1_ESM.pdf/9463176)
Supplement: MOESM1 [file 9463176]

n=11

n=25

neoadj. EBRT

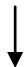

OP + IORT  
gross total: 7  
gross residual: 4

OP + IORT  
gross total: 11  
gross residual: 14

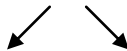

adj. EBRT  
n=20

no EBRT  
n=5
